# Supplementary material
Source: ML conference proceedings conference paper supplement (https://proceedings.mlr.press/v139/rothblum21a.html)
Supplement: Supplementary file [file rothblum21a-supp.pdf]

## A $L_{\mathcal{D}}(h) = \text{FPR}_{\mathcal{D}}(h)$ doesn't have the uniform convergence property

Recall that the false positive rate of a binary classifier can be written as

$$\text{FPR}_{\mathcal{D}}(h) \equiv \Pr[h(x) = 1 | y = 0]$$

For intuition, the fact that we condition on the event  $y = 0$  means that for distributions in which the probability of this event is small, a good estimate of the true loss will require more samples. Intuitively, this contradicts the uniform convergence requirement that there is a single number of samples that “works” for every distribution  $\mathcal{D}$ .

*Proof.* Suppose  $\mathcal{X}$  is finite and  $|\mathcal{X}| = n$ . Fix some element  $x' \in \mathcal{X}$ , and consider the distribution  $\mathcal{D}$  on  $\mathcal{X} \times Y$  obtained by taking a uniform distribution over  $\mathcal{X}$  and labeling elements via the deterministic labeling function

$$y(x) = \begin{cases} 0 & x \neq x' \\ 1 & x = x' \end{cases}$$

Consider the classifier  $h$  that labels everyone as 1:  $h(x) \equiv 1$ . Then,  $\text{FPR}_{\mathcal{D}}(h) = 1$  (since there is a single negative example, which is incorrectly labeled as a positive). On the other hand, the empirical estimate w.r.t any sample  $S \subseteq \mathcal{X} - \{x'\}$  is zero, so for such a sample, the difference between  $L_S(h)$  and  $L_{\mathcal{D}}(h)$  is at a maximal value of 1. Recall that uniform convergence requires us to estimate this difference to arbitrary precision with high probability; therefore, the “bad event” in which  $x \notin S$  must happen with probability at most  $\delta$ . Equivalently,

$$\left(\frac{n-1}{n}\right)^m \leq \delta$$

This requires taking  $m$  large enough to guarantee that  $m \geq \log \frac{1}{\delta} \cdot \frac{1}{\log \frac{n}{n-1}}$ . However, there is no function  $f : (0, 1) \rightarrow \mathbb{N}$  that guarantees that  $m \geq f(\delta)$  satisfies this condition for every  $n$ , because as  $n$  approaches infinity,  $\log \frac{n}{n-1} \rightarrow 0$ , so the expression is unbounded. □

## B Exist $L \in \mathcal{L}$ that are not multi-group compatible

*Proof.* For the counter-example we focus on binary classification and individual (metric) fairness w.r.t a binary metric (i.e., that specifies for every two individuals, whether they are identical or completely different). Fixing a metric  $d : \mathcal{X} \times \mathcal{X} \rightarrow \{0, 1\}$ , the loss function  $L$  is a combination of accuracy and individual (metric) fairness:

$$\begin{aligned} L_{\mathcal{D}}(h) &= a \cdot L_{\mathcal{D}}^{\text{IF}}(h) + b \cdot L_{\mathcal{D}}^{0-1}(h) \\ &\equiv a \cdot \Pr_{x, x' \sim \mathcal{D}_X} [h(x) \neq h(x') \wedge d(x, x') = 0] + b \cdot \Pr_{x, y \sim \mathcal{D}} [h(x) \neq y] \end{aligned}$$

Let us now construct the problem instance in question. Let the domain  $\mathcal{X}$  be  $\mathcal{X} = \{x_S, x_T, x_{ST}\}$ , with  $\mathcal{D}_X$  denoting the marginal distribution on  $\mathcal{X}$  in which  $x_S$  has probability 0.8, and  $x_T, x_{ST}$  each

have probability of 0.1. A distribution  $\mathcal{D}$  is obtained as the product of  $\mathcal{D}_X$  and  $\mathcal{D}_{Y|X=x}$ , where the latter assigns deterministic labels:  $y(x_S) = 0$  and  $y(x_{ST}) = y(x_T) = 1$ . The class  $\mathcal{H}$  consists of the constant classifiers,  $h^0$  and  $h^1$ , and the collection of groups is  $\mathcal{G} = \{S, T\}$  where  $S = \{x_S, x_{ST}\}$  and  $T = \{x_T, x_{ST}\}$ . Finally, the metric specifies that  $x_S$  and  $x_{ST}$  are identical, and the rest are different:

$$d(x_S, x_{ST}) = 0, \quad d(x_T, x_{ST}) = 1, \quad d(x_S, x_T) = 1$$

We argue that there is no classifier satisfying the multi-PAC requirement w.r.t  $\mathcal{H}$  and  $\mathcal{G}$ . To see this, we first note that

$$L_{\mathcal{D}_S}(\mathcal{H}) = b/9, \quad L_{\mathcal{D}_T}(\mathcal{H}) = 0$$

This is because the optimal classifier for  $T$  is  $h^1$ , which is perfect for both the accuracy and IF losses; whereas for  $S$ , the best classifier is  $h^0$ , which is perfect in terms of IF and has a 0-1 loss of  $1/9$ .

Assume for contradiction that for every  $\varepsilon > 0$ , there is a classifier that satisfies the multi-PAC requirement. From the perspective of  $T$ , the next-best classifier has a loss of  $1/2$ . So, for multi-PAC with  $\varepsilon < 1/2$ , it must be the case that  $h(x_{ST}) = 1$ . On the other hand, from the perspective of  $S$ , when  $a \gg b$  the next-best classifier has loss  $8b/9$ . So, for multi-PAC with  $\varepsilon < 7b/9$ , it must be the case that  $h(x_{ST}) = 0$ . This means that for this problem instance and for  $\varepsilon < \min\{7b/9, 1/2\}$ , there is no classifier satisfying the  $\varepsilon$ -multi-PAC requirement. □

## C Proof of Lemma 4.3 (compatibility $\rightarrow$ $f$ -proper)

Let  $L$  be any unambiguous and compatible loss. First, we note that by unambiguity, for any singleton distribution  $\mathcal{D}$ , the loss minimizer is unique. We can therefore denote it by  $h_{\mathcal{D}}^*$ .

Next, we make an observation that we will use in the proof: that for any distribution  $\mathcal{D}$ , the classifier  $h : \mathcal{X} \rightarrow [0, 1]$  defined by

$$h(x) = \begin{cases} h_{\mathcal{D}_x}^*(x), & x \in \text{supp}(\mathcal{D}) \\ 0, & \text{otherwise} \end{cases}$$

minimizes the loss  $L_{\mathcal{D}}(\cdot)$ . That is, we are forming a new classifier  $h$  by predicting on an input  $x \in \text{supp}(\mathcal{D})$  using the prediction of the classifier that minimizes the loss on the distribution  $\mathcal{D}$  restricted to  $x$ . The claim is that this classifier is competitive with the best possible loss on the original distribution  $\mathcal{D}$ .

We claim that the observation follows as a corollary from the compatibility assumption. Note that this is trivially the case for any singleton distribution  $\mathcal{D}$  (by unambiguity), so assume for contradiction that there is a non-singleton distribution  $\mathcal{D}$  for which the observation does not hold. We define a multi-PAC problem instance as follows. For  $x \in \mathcal{X}$ , let  $g_x = \{x\}$  denote the singleton group that consists only of  $x$ . Define  $\mathcal{G}_{\text{singletons}} = \{g_x : x \in \text{supp}(\mathcal{D})\}$  and  $\mathcal{H}_{\text{singletons}} = \{h_{\mathcal{D}_x}^* : x \in \text{supp}(\mathcal{D})\}$ . Additionally, let  $h^*$  denote some classifier in  $\arg \min_h L_{\mathcal{D}}(h)$ . Finally,

$$\begin{aligned}\mathcal{G} &= \mathcal{G}_{\text{singletons}} \cup \{\text{supp}(\mathcal{D})\} \\ \mathcal{H} &= \mathcal{H}_{\text{singletons}} \cup \{h^*\}\end{aligned}$$

Note that by definition, for every group  $g$  in  $\mathcal{G}$ ,  $L_{\mathcal{D}_g}(\mathcal{H}) = 0$  (because we specifically included an optimal classifier for every group in  $\mathcal{H}$ ). Multi-PAC for the singleton groups  $\mathcal{G}_{\text{singletons}}$  with an arbitrarily small precision  $\varepsilon$  therefore requires that we predict  $h_{\mathcal{D}_x}^*(x)$  for  $x \in \text{supp}(\mathcal{D})$ . But by the assumption, the resulting classifier is not optimal for the group  $\{\text{supp}(\mathcal{D})\}$ , in violation to multi-PAC w.r.t that group. This completes the proof of the observation.

We can now use the observation to directly prove niceness. We will do this by constructing a specific function  $f$  and showing that the classifier defined by  $h_{\mathcal{D}}(x) = f(x, \mathbf{E}_{\mathcal{D}}[y|x])$  always minimizes the loss  $L_{\mathcal{D}}$ . Consider

$$f(x, v) = h_{\mathcal{D}_{x,v}}^*(x)$$

where  $\mathcal{D}_{x,v}$  is the singleton distribution supported on  $x$  that predicts a label of 1 w.p  $v$ , and  $h_{\mathcal{D}_{x,v}}^*$  is the loss minimizer for this distribution (which, by unambiguity, is indeed unique).

We need to prove that  $f$  satisfies the requirement in the definition of  $f$ -proper. Fix some distribution  $\mathcal{D}$ ; we need to prove that

$$h_{\mathcal{D}} \in \arg \min_h L_{\mathcal{D}}(h)$$

where  $h_{\mathcal{D}}(x) = f(x, \mathbf{E}_{\mathcal{D}}[y|x])$ .

By the observation, the classifier that predicts for  $x \in \text{supp}(\mathcal{D})$  using the optimal classifier for  $\mathcal{D}_x$  is itself optimal for  $\mathcal{D}$ . But by construction,  $\mathcal{D}_x \equiv \mathcal{D}_{x, \mathbf{E}_{\mathcal{D}}[y|x]}$ , so we get:

$$h_{\mathcal{D}_x}^*(x) = h_{\mathcal{D}_{x, \mathbf{E}_{\mathcal{D}}[y|x]}}^* = f(x, \mathbf{E}_{\mathcal{D}}[y|x]) = h_{\mathcal{D}}(x)$$

In other words, the classifier that predicts for  $x \in \text{supp}(\mathcal{D})$  using the optimal classifier for  $\mathcal{D}_x$  is precisely  $h_{\mathcal{D}}$ . The observation therefore proves  $h_{\mathcal{D}} \in \arg \min_h L_{\mathcal{D}}(h)$ , as required.

## D Proof of Lemma 4.4 ( $f$ -proper $\rightarrow$ learnability)

To prove the lemma, we construct a learning algorithm, `MultiGroupL`, and prove that when  $L$  is compatible and has the uniform convergence property, the output of this algorithm satisfies the requirements in the definition of multi-group learnability.

The definition of `MultiGroupL` is given in Algorithm 3. At a high-level, `MultiGroupL` accepts a class  $\mathcal{H}$ , collection of subgroups  $\mathcal{G}$  and parameters  $\varepsilon, \delta, \gamma$ , and returns a classifier by invoking a learning algorithm for OI w.r.t an appropriate distinguisher class  $\mathcal{A}$ . The definition of each distinguisher  $A \in \mathcal{A}$  is given separately – see Algorithm 4.

We begin by proving that if  $L$  is  $f$ -proper, then  $h \leftarrow \text{MultiGroup}_{L, \varepsilon}(\varepsilon, \delta, \mathcal{H}, \mathcal{G})$  satisfies the  $(\varepsilon, \delta)$ -multi-group requirement w.r.t  $\mathcal{H}$  and  $\mathcal{G}$ .

---

**Algorithm 3**  $\text{MultiGroup}_{L,f}(\epsilon, \delta, \gamma, \mathcal{H}, \mathcal{G})$ 


---

- 1: **Parameters:** loss function  $L$ , function  $f : \mathcal{X} \times [0, 1] \rightarrow [0, 1]$
  - 2: **Input:** accuracy parameter  $\epsilon \in (0, 1)$ , failure probability  $\delta \in (0, 1)$ , minimal subgroups size parameter  $\gamma \in (0, 1)$ , hypothesis class  $\mathcal{H}$ , collection of subgroups  $\mathcal{G}$ .
  - 3: **Output:** A classifier  $h$  satisfying the  $(\epsilon, \delta)$ -multi-group guarantee w.r.t  $\mathcal{H}$  and  $\mathcal{G}$
  - 4: Set  $\epsilon' = \alpha = \epsilon/4$  and  $\delta' = \eta = \tau = \delta/4$ .
  - 5: Set  $k_{\mathcal{G}} = m_L^{\text{UC}}(\epsilon', \delta', |\mathcal{H}| + 1)$ .
  - 6: Set  $k = 10 \cdot \frac{1}{\gamma} \cdot \log \frac{1}{\delta'} \cdot k_{\mathcal{G}}$ .
  - 7: Let  $\mathcal{A} = \left\{ A_{g,h,\alpha}^{L,f,k} \mid g \in \mathcal{G}, h \in \mathcal{H} \right\}$  be a collection of distinguishers, as defined in Algorithm 4.
  - 8: Invoke OI as a sub-routine to learn  $\tilde{p} \leftarrow \text{OI}(\tau, \eta, \mathcal{A})$ .
  - 9: **return**  $f(\tilde{p})$
- 

**Lemma D.1.** *Suppose  $L$  is  $f$ -proper. Fix a distribution  $\mathcal{D}$  over  $\mathcal{X} \times Y$ , a finite class  $\mathcal{H}$ , a finite collection of subgroups  $\mathcal{G}$  and parameters  $\delta, \epsilon, \gamma \in (0, 1)$ . Then, w.p at least  $1 - \delta$ , the predictor  $h \leftarrow \text{MultiGroup}_{L,f}(\epsilon, \delta, \gamma, \mathcal{H}, \mathcal{G})$  satisfies*

$$\forall g \in \mathcal{G}_\gamma : L_{\mathcal{D}_g}(h) \leq L_{\mathcal{D}_g}(\mathcal{H}) + \epsilon$$

*Proof.* We begin by lower-bounding the acceptance probability of each distinguisher  $A \in \mathcal{A}$  when it receives samples from the modeled distribution  $\tilde{\mathcal{D}}$ . Recall that this is the distribution in which outcomes  $y_i$  are sampled according to  $\text{Ber}(\tilde{p}(x_i))$ , where  $\tilde{p}$  is the predictor returned by OI.

**Claim D.2.** *The probability that each  $A \triangleq A_{g,h} \in \mathcal{A}$  accepts when given samples from the modeled distribution  $\tilde{\mathcal{D}}$  is at least  $1 - 2\delta'$ :*

$$\Pr_{\{(x_i, y_i)\}_{i=1}^k \sim \tilde{\mathcal{D}}^k} [A(\{(x_i, y_i, \tilde{p}(x_i))\}_{i=1}^k) = 1] \geq 1 - 2\delta'$$

To see why this is true, we first note that by construction, the predictor  $f(\tilde{p})$  (where  $f(\tilde{p})(x) = f(x, \tilde{p}(x))$ ) coincides with the predictor  $h_{\tilde{\mathcal{D}}}$  from the definition of  $f$ -proper. Thus, invoking the assumption that  $L$  is  $f$ -proper for the distribution  $\mathcal{D}_g$  guarantees that

$$L_{\tilde{\mathcal{D}}_g} f(\tilde{p}) \leq L_{\tilde{\mathcal{D}}_g}(h) \tag{4}$$

To relate this fact to the acceptance criteria of  $A$ , which is in terms of a sample  $S_g$  from  $\tilde{\mathcal{D}}_g$ , we need to use the uniform convergence property of  $L$ . Recall that the distinguisher operates on  $k = 10 \cdot \frac{1}{\gamma} \cdot \log \frac{1}{\delta'} \cdot k_{\mathcal{G}}$  samples from  $\tilde{\mathcal{D}}$ ; this was chosen precisely to guarantee that w.p at least  $1 - \delta'$ , we have at least  $k_{\mathcal{G}}$  samples from  $\tilde{\mathcal{D}}_g$  for every group  $g$  whose mass is at least  $\gamma$ . Since  $k_{\mathcal{G}} = m_L^{\text{UC}}(\epsilon', \delta', |\mathcal{H}| + 1)$ , we have a uniform convergence guarantee for the class that includes  $\mathcal{H}$  and  $\tilde{p}$ . That is, we know that w.p at least  $1 - \delta'$

$$\left| L_{S_g}(h) - L_{\tilde{\mathcal{D}}_g}(h) \right| \leq \epsilon', \quad \left| L_{S_g}(f(\tilde{p})) - L_{\tilde{\mathcal{D}}_g}(f(\tilde{p})) \right| \leq \epsilon' \tag{5}$$

---

**Algorithm 4**  $A_{g,h,\alpha}^{L,f,k}$  (multi-sample Sample-Access OI distinguisher)

---

- 1: **Parameters:** number of samples  $k \in \mathbb{N}$ , group  $g \subseteq \mathcal{X}$ , classifier  $h : \mathcal{X} \rightarrow [0, 1]$ , loss function  $L$ , function  $f : \mathcal{X} \times [0, 1] \rightarrow [0, 1]$
- 2: **Input:**  $\{(x_i, y_i, p_i)\}_{i=1}^k$ , where  $x_i \in \mathcal{X}$ ,  $y_i \in \{0, 1\}$  and  $p_i \in [0, 1]$
- 3: **Output:** A binary output denoting Accept/Reject
- 4:  $I_g = \{i : x_i \in g\}$
- 5:  $S_g = \{(x_i, y_i)\}_{i \in I_g}$
- 6: Define a predictor  $f_g$  as

$$f_g(x) = \begin{cases} f(x_i, p_i) & \exists i \in [k] \text{ such that } x = x_i \\ 0 & \text{otherwise} \end{cases} \quad (3)$$

- 7: **if**  $L_{S_g}(f_g) < L_{S_g}(h) + 2\alpha$  **then**
  - 8:     **return** 1
  - 9: **end if**
  - 10: **return** 0
- 

Combining Equations (4) and (5), we have that with probability at least  $1 - 2\delta'$  (obtained by union bounding with respect to the two  $\delta'$  failure probabilities we used above),

$$L_{S_g}(f(\tilde{p})) \leq L_{S_g}(h) + 2\epsilon'$$

Finally, we note that w.r.t  $S_g$ , the predictor  $f_g$  defined in Equation (3) of Algorithm 4 is the same as  $f(\tilde{p})$  – so the above is precisely the acceptance criterion for  $A$  in this case. We thus conclude that the acceptance probability of  $A$  when it receives samples from the modeled distribution is at least  $1 - 2\delta'$ , which concludes the proof of the claim.

Next, we argue that a direct corollary is a related lower bound on the acceptance probability of  $A$  when it receives samples from the true distribution  $\mathcal{D}$ .

**Claim D.3.** *The probability that each  $A \triangleq A_{g,h} \in \mathcal{A}$  accepts when given samples from the true distribution  $\mathcal{D}$  is at least  $1 - (2\delta' + \tau + \eta)$ :*

$$\Pr_{\{(x_i, y_i)\}_{i=1}^k \sim \mathcal{D}^k} [A(\{(x_i, y_i, \tilde{p}(x_i))\}_{i=1}^k) = 1] \geq 1 - (2\delta' + \tau + \eta)$$

The claim follows as a direct corollary from the previous claim. By definition, since OI is a learning algorithm for OI predictors,  $\tilde{p}$  is  $(\tau, \mathcal{A})$ -OI w.p at least  $1 - \eta$ . Recall that if  $\tilde{p}$  is  $(\tau, \mathcal{A})$ -OI, then we are guaranteed that the probabilities of each  $A \in \mathcal{A}$  accepting on samples from  $\tilde{\mathcal{D}}$  and  $A$  accepting on samples from  $\mathcal{D}$  differ by at most  $\tau$ :

$$\left| \Pr_{\{(x_i, y_i)\}_{i=1}^k \sim \mathcal{D}^k} [A(\{(x_i, y_i, \tilde{p}(x_i))\}_{i=1}^k) = 1] - \Pr_{\{(x_i, y_i)\}_{i=1}^k \sim \tilde{\mathcal{D}}^k} [A(\{(x_i, y_i, \tilde{p}(x_i))\}_{i=1}^k) = 1] \right| \leq \tau \quad (6)$$

in other words, w.p at least  $1 - \eta$  we are guaranteed that  $\Pr_{\{(x_i, y_i)\}_{i=1}^k \sim \mathcal{D}^k} [A(\{(x_i, y_i, \tilde{p}(x_i))\}_{i=1}^k) = 1] \geq$

$1] \geq 102\delta' - \tau$ . This implies that a lower bound on the acceptance probability in this case is exactly  $1 - (2\delta' + \tau + \eta)$ , completing the proof of the claim.

Next, we recall that by the definition of the acceptance condition for  $A$ , the condition in Equation (6) is the same as saying that w.p at least  $1 - (2\delta' + \tau + \eta)$  over the choice of  $S_g \sim \mathcal{D}_g$ ,

$$L_{S_g}(f(\tilde{p})) \leq L_{S_g}(h) + 2\epsilon'$$

Again using the uniform convergence guarantee from Equation (5), this implies

$$L_{\mathcal{D}_g}(f(\tilde{p})) \leq L_{\mathcal{D}_g}(h) + 4\epsilon'$$

Plugging in  $\epsilon' = \epsilon/4$  and  $\delta' = \tau = \eta = \delta/4$ , we conclude that w.p at least  $1 - \delta$ ,

$$L_{\mathcal{D}_g}(f(\tilde{p})) \leq L_{\mathcal{D}_g}(h) + \epsilon$$

which is the required. This completes the proof of Lemma D.1.  $\square$

To prove multi-group learnability, it remains to bound the sample complexity of Algorithm 3, which we do in the following claim.

**Claim D.4.** *The sample complexity of Algorithm 3 is*

$$m_L^{\text{gPAC}}(\epsilon, \delta, \gamma, \mathcal{H}, \mathcal{G}) = O\left(\frac{m_{\mathcal{H}}(\epsilon, \delta) \cdot \log\left(\frac{|\mathcal{H}| \cdot |\mathcal{G}|}{\epsilon}\right)}{\delta^4 \cdot \gamma}\right)$$

*Proof.* By the definition of Algorithm 3, the number of samples required is the number of samples required to obtain OI w.r.t  $(\tau, \eta, \mathcal{A})$ , where  $\mathcal{A}$  is a collection of  $|\mathcal{H}| \cdot |\mathcal{G}|$   $k$ -sample OI distinguishers. By Theorem 2.8, this requires an order of  $O\left(\frac{k \cdot \log(|\mathcal{A}|/\eta)}{\tau^4}\right)$  samples. Ignoring constant factors and plugging in the settings of  $k, \eta$  and  $\tau$  used in Algorithm 3,

$$\begin{aligned} \eta &= O(\delta) \\ \tau &= O(\epsilon) \\ k &= O\left(\frac{1}{\gamma} \cdot \log \frac{1}{\delta} \cdot m_L^{\text{UC}}(\epsilon, \delta, |\mathcal{H}|)\right) = O\left(\frac{1}{\gamma} \cdot \log \frac{1}{\delta} \cdot m_{\mathcal{H}}(\epsilon, \delta)\right) \end{aligned}$$

we obtain the stated bound.  $\square$

Note that when  $L$  has the uniform convergence property, this entire expression is indeed polynomial in  $1/\epsilon, 1/\delta, 1/\gamma$  and  $\log(|\mathcal{H}|), \log(|\mathcal{G}|)$ , as required. Together with the previous lemma, this concludes the proof of Lemma 4.4.
